# Supplementary material for: FoxO3a Inhibits Tamoxifen-Resistant Breast Cancer Progression by Inducing Integrin α5 Expression
Source: MDPI journal article supplement (doi:10.3390/cancers14010214), 2022-01-02
Supplement: s1 [file s1]

Figure 2 (b)

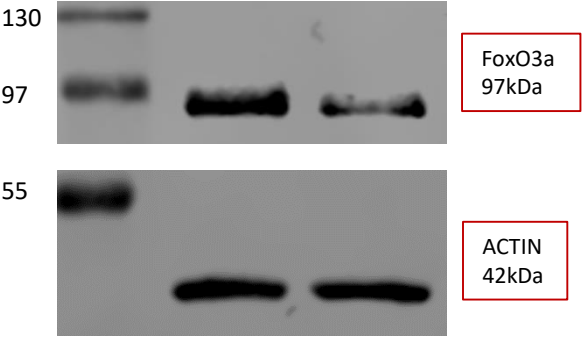

| Lane             | 1    | 2    |
|------------------|------|------|
| FoxO3a           | 14.1 | 7.9  |
| Actin            | 26.9 | 27.8 |
| Ratio            | 0.52 | 0.28 |
| Normalized ratio | 1    | 0.5  |

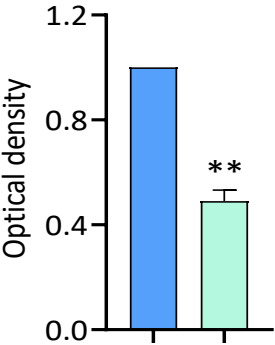

Figure 2 (f)

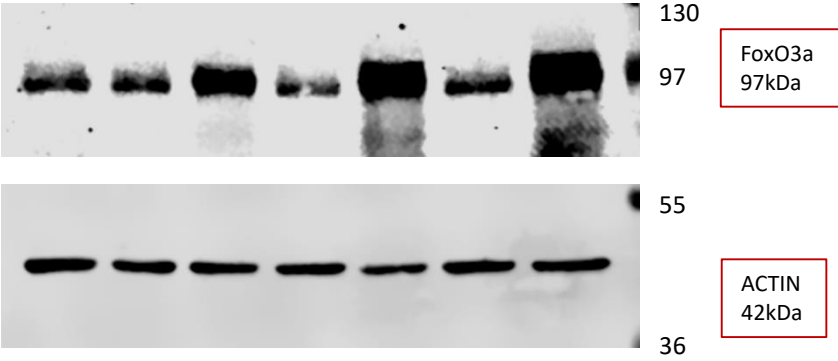

| Lane             | 1    | 2    | 3    | 4    | 5    | 6    | 7    |
|------------------|------|------|------|------|------|------|------|
| FoxO3a           | 5.6  | 5    | 15.4 | 4    | 34   | 6    | 48   |
| Actin            | 23.9 | 19.7 | 16.5 | 15.9 | 10.2 | 19.6 | 20.9 |
| Ratio            | 0.23 | 0.3  | 0.9  | 0.3  | 3.3  | 0.3  | 2.3  |
| Normalized ratio | 1    | 1.3  | 3.9  | 1.3  | 14.3 | 1.3  | 10   |

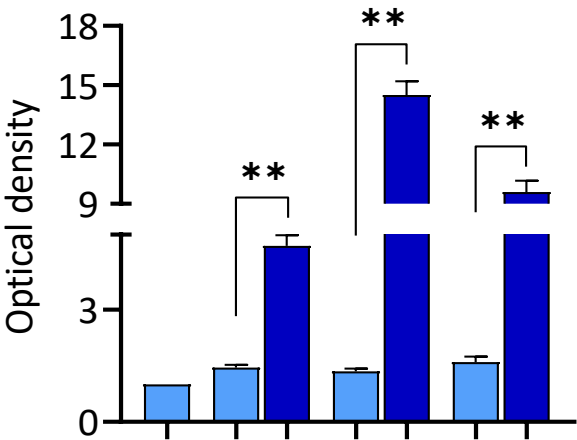

**Figure 3 (a)**

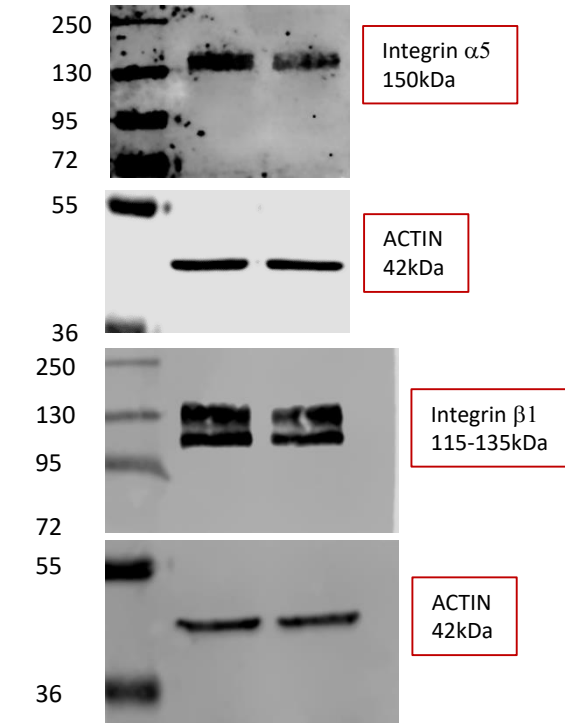

| Lane                | 1   | 2    |
|---------------------|-----|------|
| Integrin $\alpha 5$ | 4   | 2.5  |
| Actin               | 42  | 38.7 |
| Ratio               | 0.1 | 0.06 |
| Normalized ratio    | 1   | 0.6  |

| Lane                | 1    | 2    |
|---------------------|------|------|
| Integrin $\alpha 5$ | 8.49 | 8    |
| Actin               | 18.9 | 18.6 |
| Ratio               | 0.45 | 0.43 |
| Normalized ratio    | 1    | 0.96 |

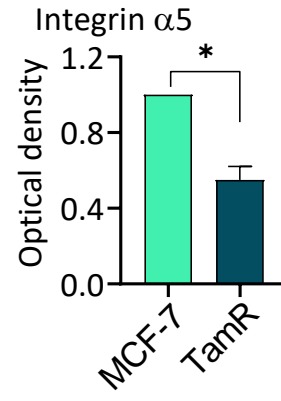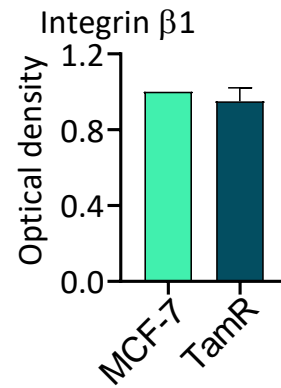

Figure 3 (c)

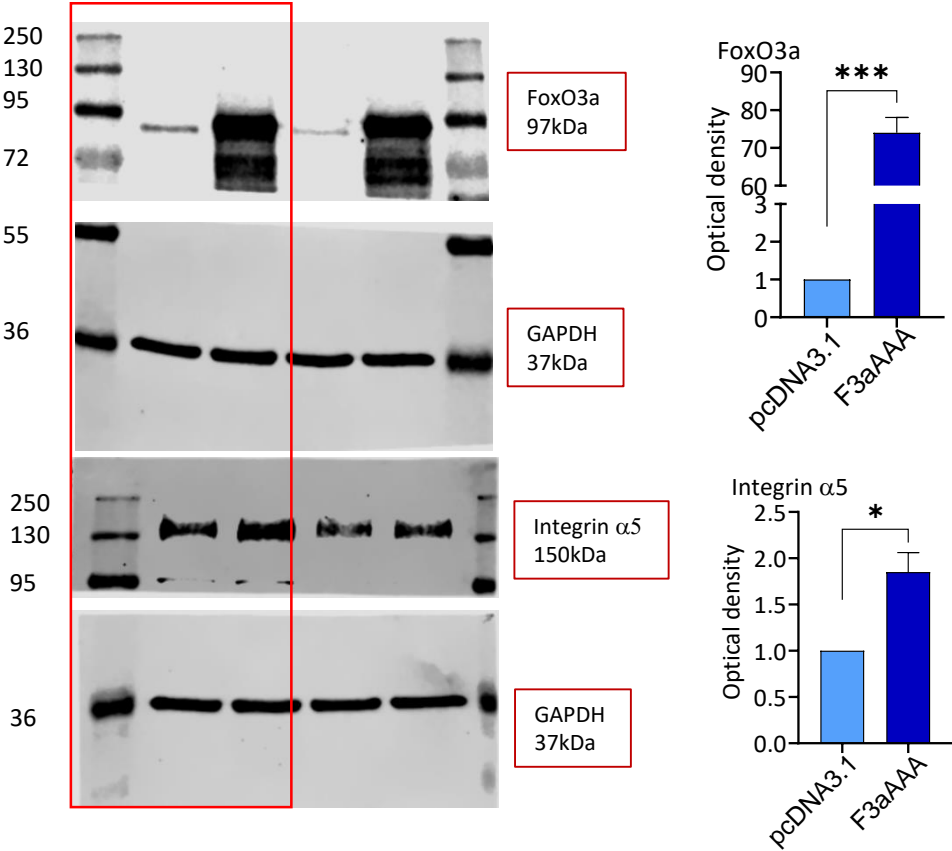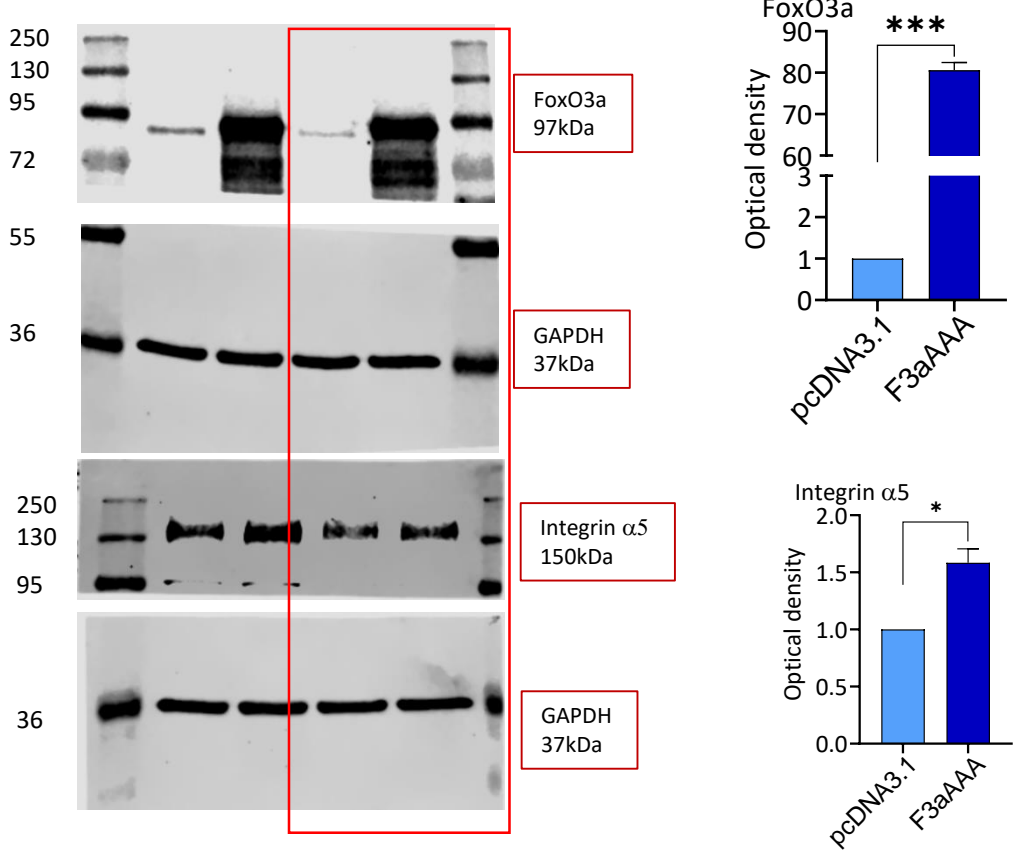

Figure 3 (d)

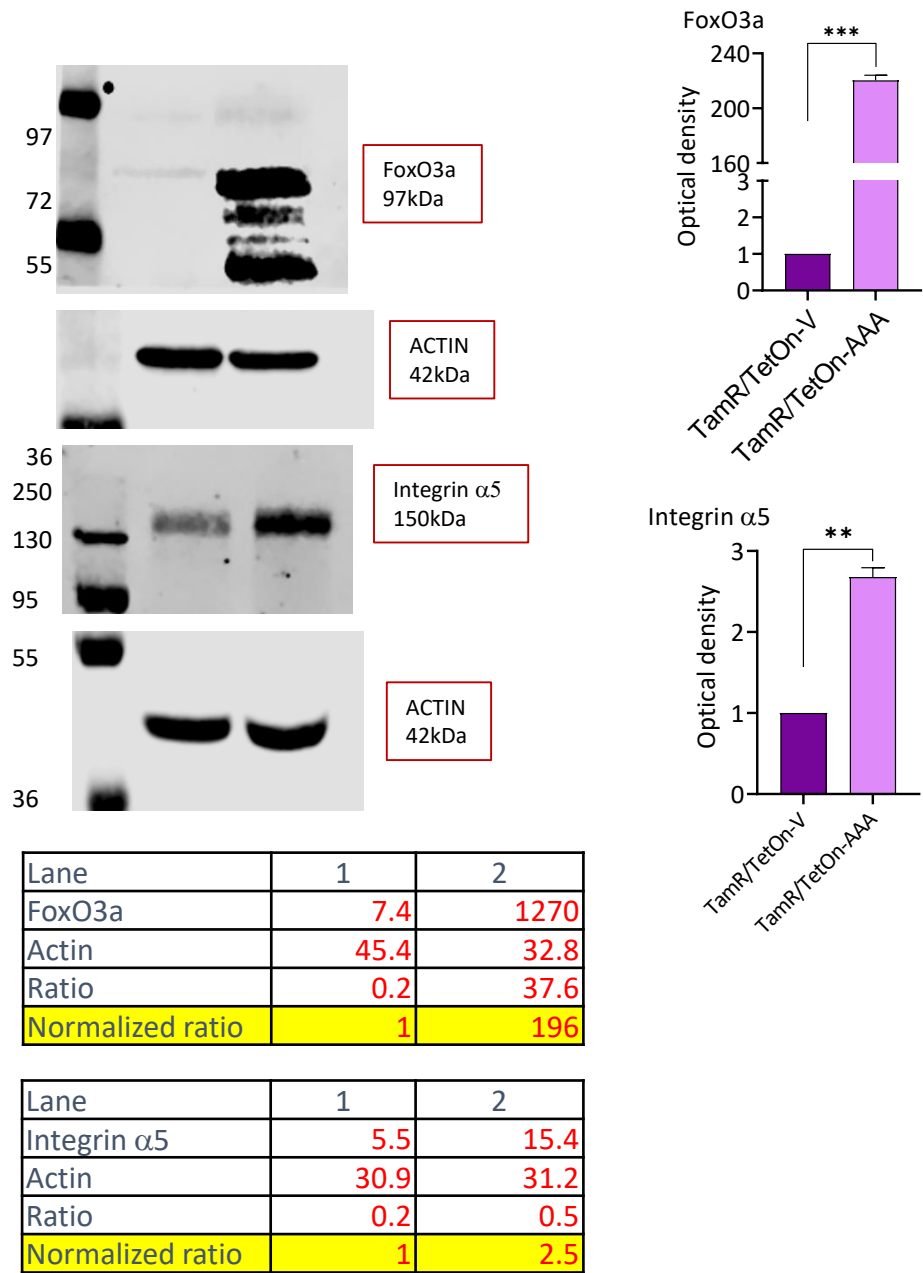

Figure 3 (e)

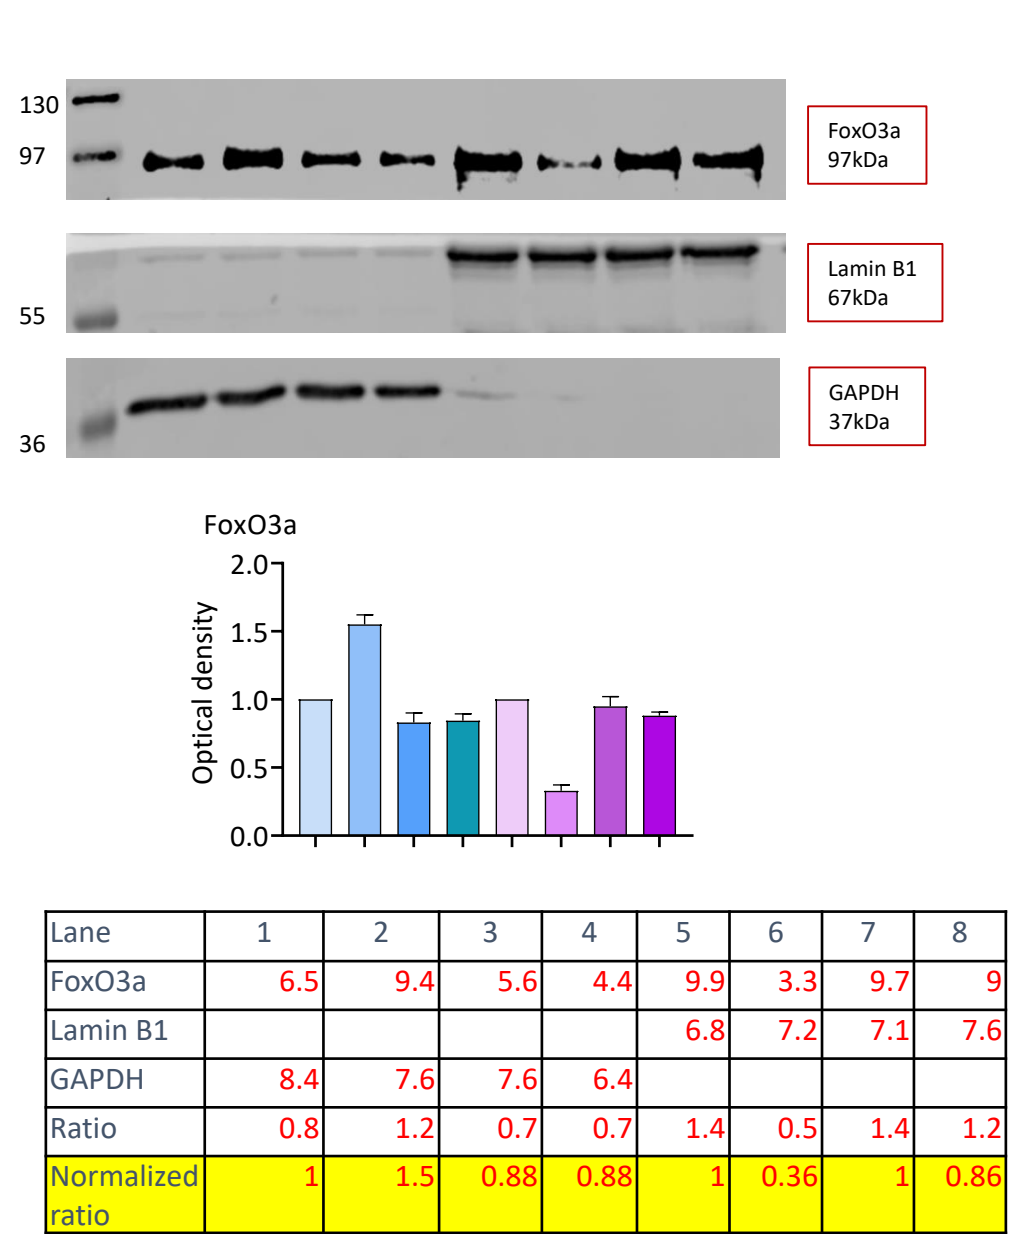

Figure 3 (f)

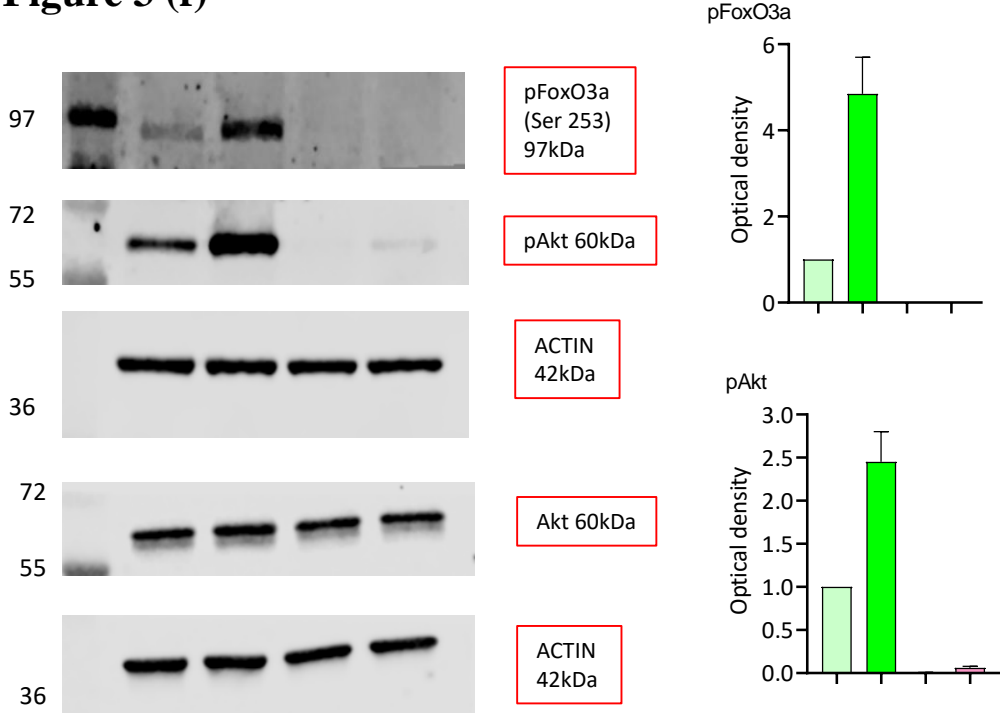

Figure 3 (g)

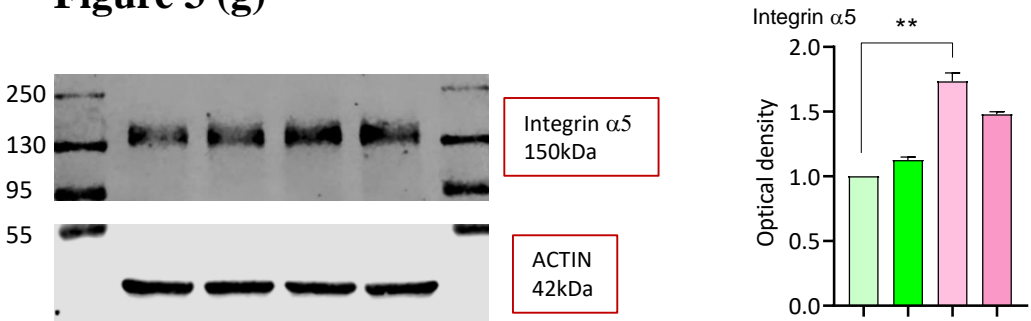

|                     |      |      |      |      |
|---------------------|------|------|------|------|
| Lane                | 1    | 2    | 3    | 4    |
| Integrin $\alpha 5$ | 6.36 | 6.8  | 9.2  | 8.5  |
| Actin               | 6.6  | 6.2  | 5.7  | 5.9  |
| Ratio               | 0.96 | 1.1  | 1.6  | 1.4  |
| Normalized ratio    | 1    | 1.15 | 1.67 | 1.46 |

Figure 3 (h)

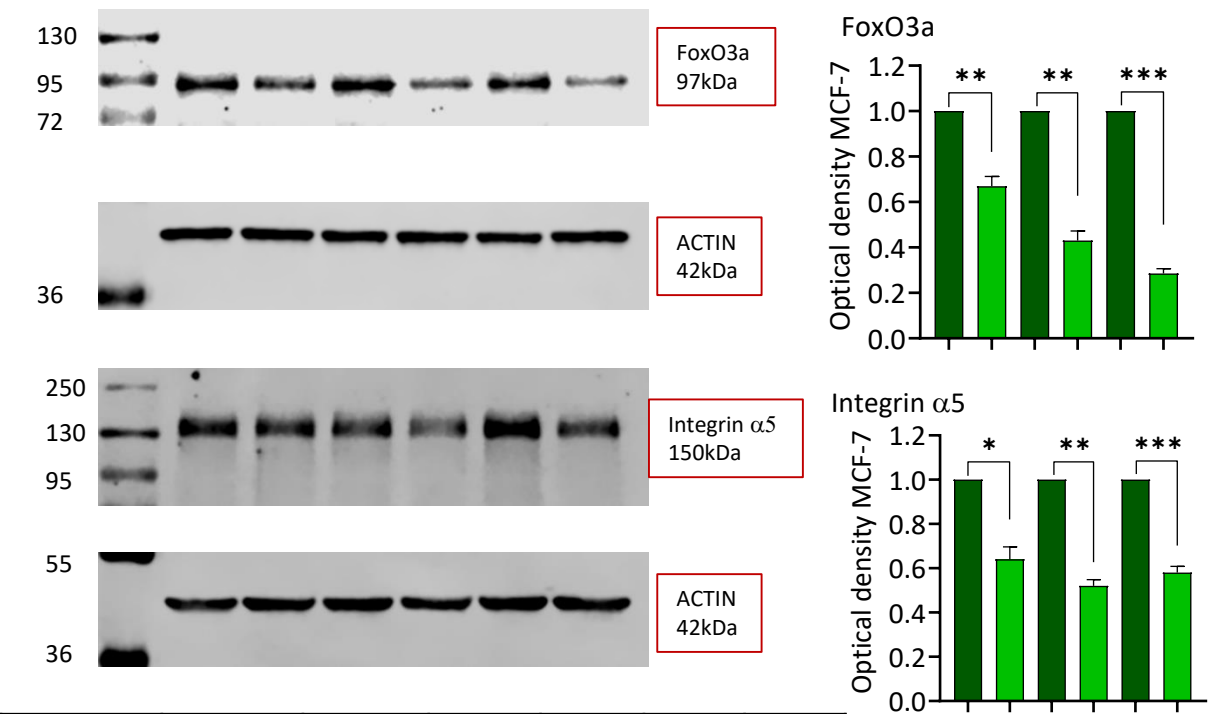

|                  |      |      |      |      |      |      |
|------------------|------|------|------|------|------|------|
| Lane             | 1    | 2    | 3    | 4    | 5    | 6    |
| FoxO3a           | 8.8  | 5.3  | 9.3  | 4    | 7.2  | 2.7  |
| Actin            | 30.1 | 27.8 | 21.4 | 23.7 | 18.3 | 26   |
| Ratio            | 0.3  | 0.2  | 0.4  | 0.2  | 0.4  | 0.1  |
| Normalized ratio | 1    | 0.67 | 1    | 0.5  | 1    | 0.25 |

|                  |     |      |      |      |      |      |
|------------------|-----|------|------|------|------|------|
| Lane             | 1   | 2    | 3    | 4    | 5    | 6    |
| Integrin α5      | 15  | 13   | 13   | 8    | 23   | 11   |
| Actin            | 9.4 | 13.1 | 14.3 | 13.8 | 16.1 | 14.3 |
| Ratio            | 1.6 | 1    | 0.9  | 0.58 | 1.4  | 0.8  |
| Normalized ratio | 1   | 0.63 | 1    | 0.6  | 1    | 0.6  |

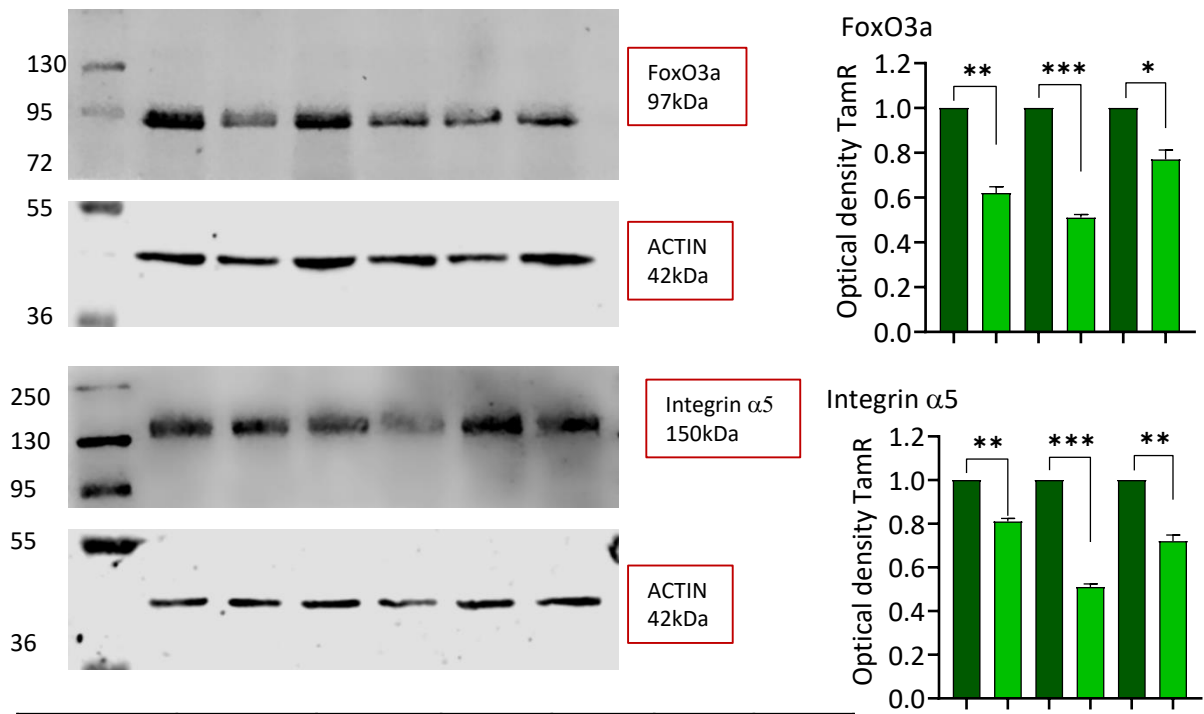

|                  |      |      |     |      |     |      |
|------------------|------|------|-----|------|-----|------|
| Lane             | 1    | 2    | 3   | 4    | 5   | 6    |
| FoxO3a           | 9    | 3    | 7   | 3.5  | 3   | 4    |
| Actin            | 13.5 | 8.10 | 14  | 13.4 | 6.6 | 14.4 |
| Ratio            | 0.7  | 0.4  | 0.5 | 0.26 | 0.4 | 0.3  |
| Normalized ratio | 1    | 0.6  | 1   | 0.5  | 1   | 0.75 |

|                  |      |      |     |      |      |      |
|------------------|------|------|-----|------|------|------|
| Lane             | 1    | 2    | 3   | 4    | 5    | 6    |
| Integrin α5      | 3    | 2.8  | 3   | 1.3  | 3.3  | 3.2  |
| Actin            | 9.92 | 11.3 | 9.5 | 8.5  | 12.4 | 14.6 |
| Ratio            | 0.3  | 0.25 | 0.3 | 0.15 | 0.3  | 0.2  |
| Normalized ratio | 1    | 0.8  | 1   | 0.5  | 1    | 0.7  |

Figure 4 (b)

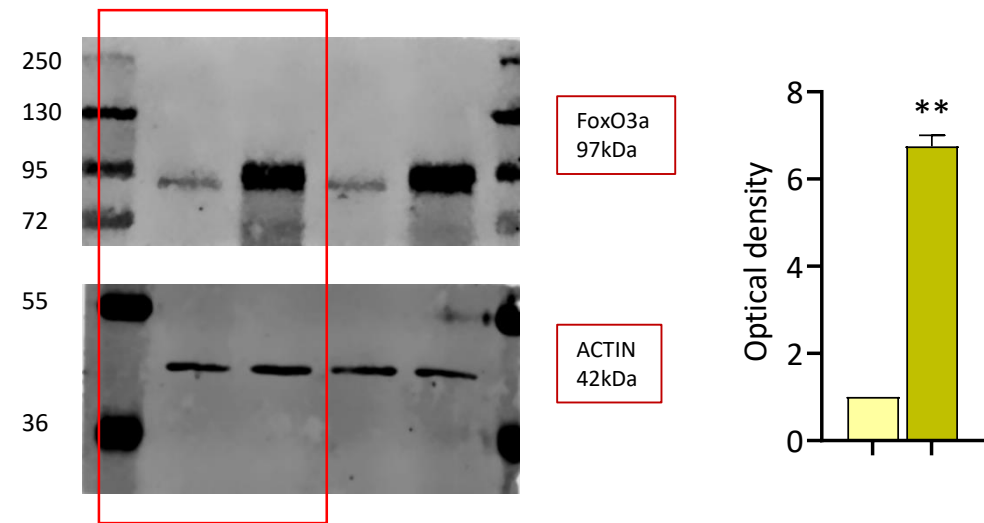

Figure 4 (c)

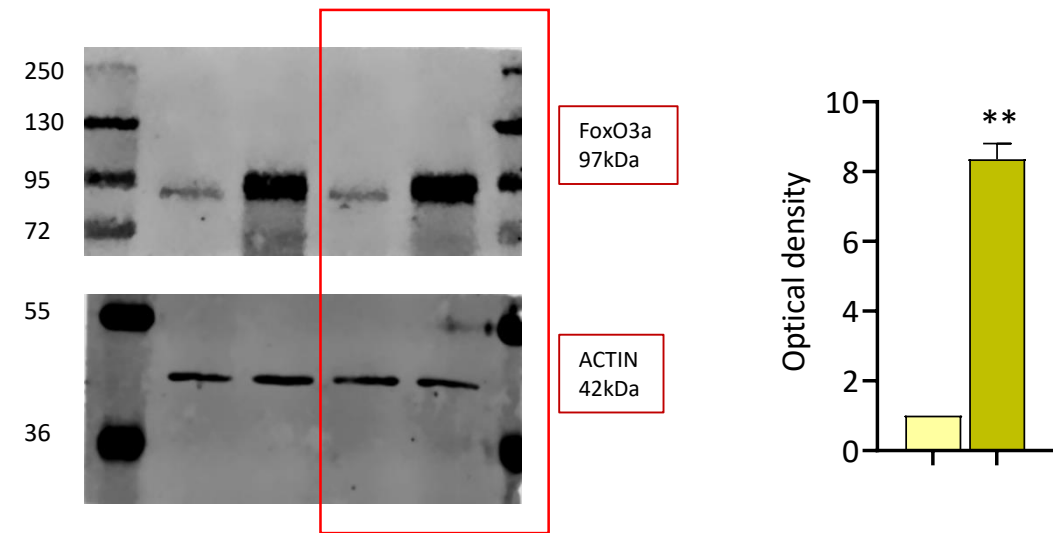

**Figure 4 (e)**

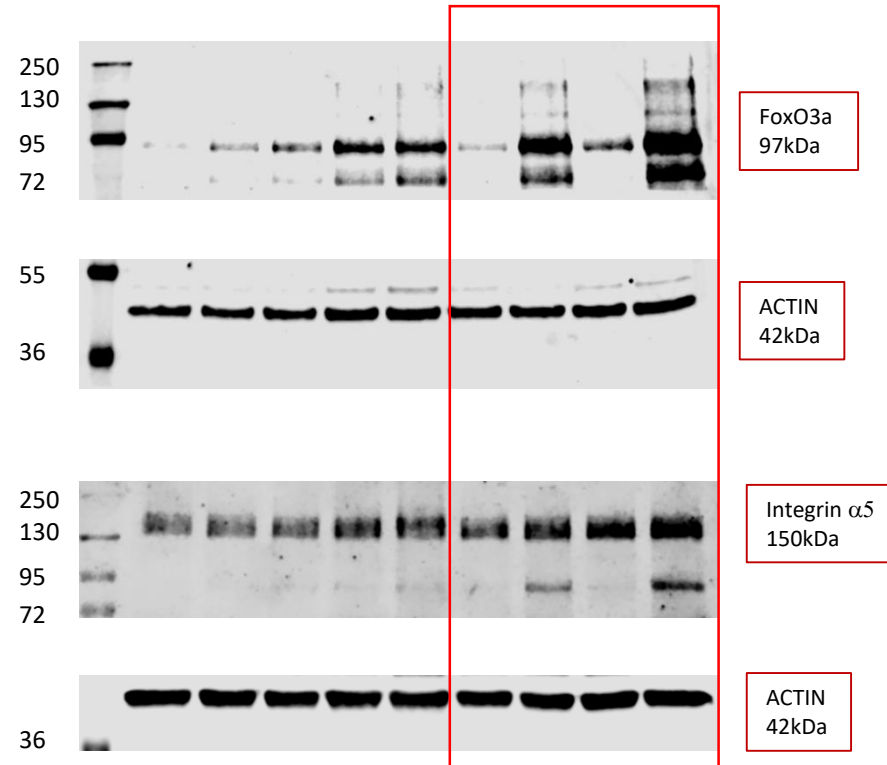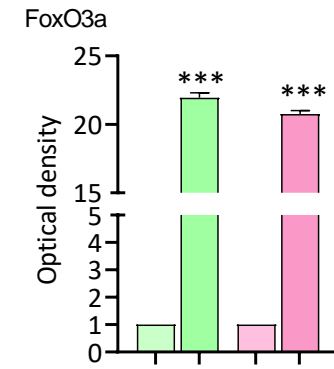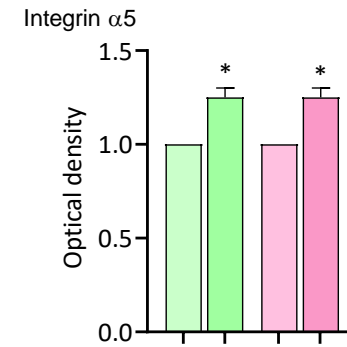

| Lane             | 1    | 2    | 3    | 4    |
|------------------|------|------|------|------|
| FoxO3a           | 7.5  | 171  | 23.2 | 521  |
| Actin            | 23.8 | 25.6 | 30.7 | 31.8 |
| Ratio            | 0.3  | 6.7  | 0.8  | 16.4 |
| Normalized ratio | 1    | 22.3 | 1    | 20.5 |

| Lane                | 1    | 2    | 3    | 4    |
|---------------------|------|------|------|------|
| Integrin $\alpha$ 5 | 1    | 1.4  | 1.7  | 2.3  |
| Actin               | 30.8 | 33.8 | 51.9 | 59.5 |
| Ratio               | 0.03 | 0.04 | 0.03 | 0.04 |
| Normalized ratio    | 1    | 1.33 | 1    | 1.33 |



Figure 5 (a)

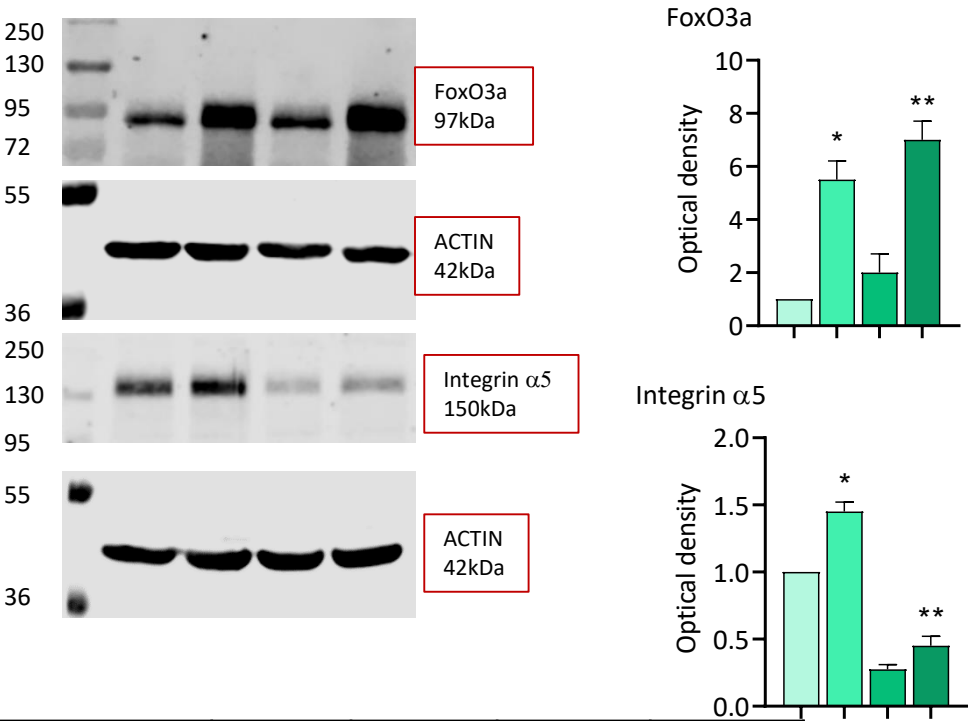

Figure 5 (b)

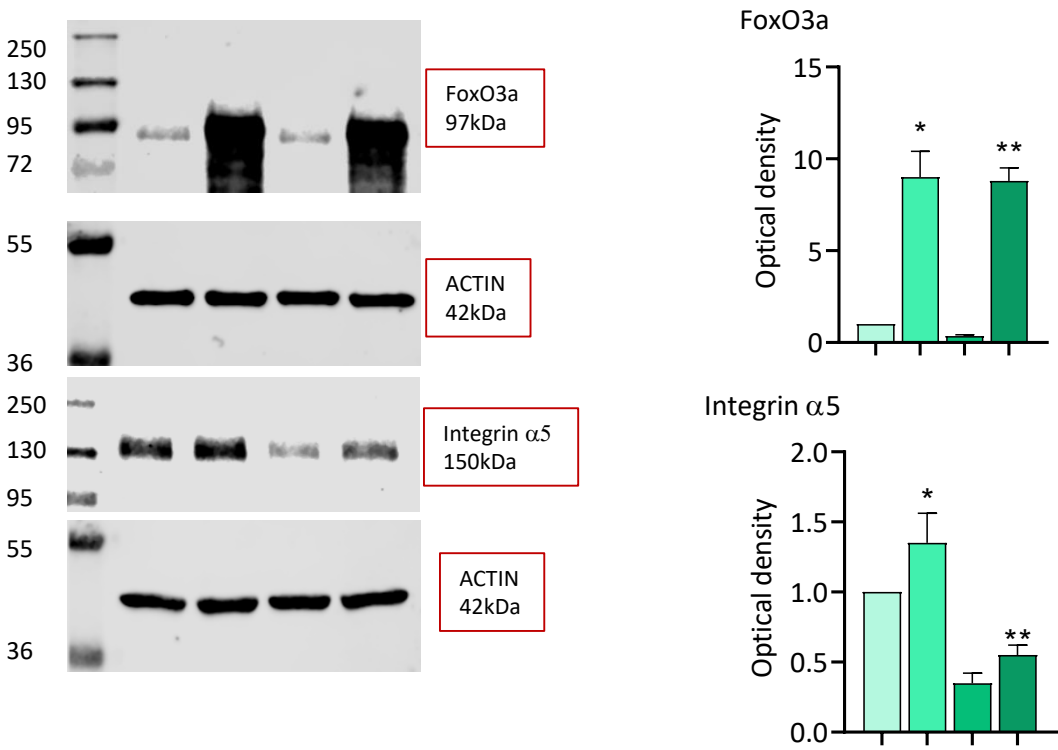

|                  |      |      |      |      |
|------------------|------|------|------|------|
| Lane             | 1    | 2    | 3    | 4    |
| FoxO3a           | 3.7  | 32.1 | 3.3  | 21.4 |
| Actin            | 61.6 | 58.1 | 60.4 | 43.9 |
| Ratio            | 0.06 | 0.6  | 0.05 | 0.5  |
| Normalized ratio | 1    | 10   | 0.83 | 8.3  |

|                  |      |      |       |      |
|------------------|------|------|-------|------|
| Lane             | 1    | 2    | 3     | 4    |
| Integrin α5      | 1    | 1.3  | 0.4   | 0.64 |
| Actin            | 46.7 | 45.9 | 47.7  | 58   |
| Ratio            | 0.02 | 0.03 | 0.008 | 0.01 |
| Normalized ratio | 1    | 1.5  | 0.4   | 0.5  |

Appendix A (f)

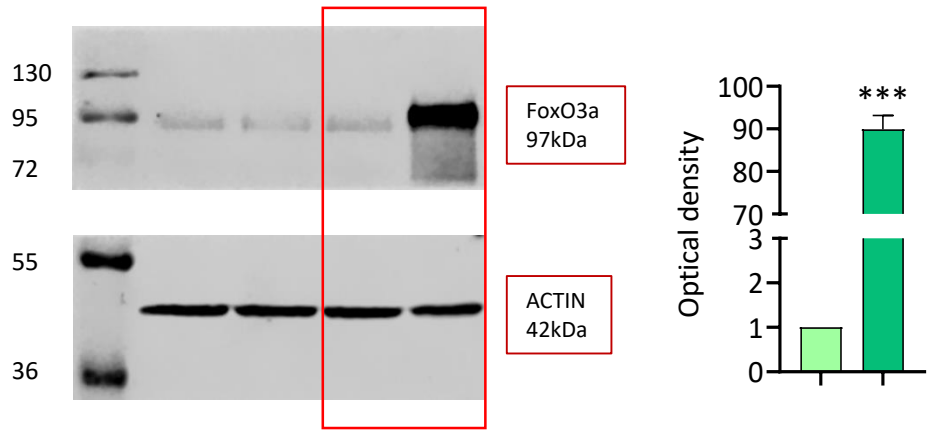

| Lane             | 1    | 2    |
|------------------|------|------|
| FoxO3a           | 1    | 60   |
| Actin            | 29.9 | 23.1 |
| Ratio            | 0.03 | 2.6  |
| Normalized ratio | 1    | 87   |

Appendix A (i)

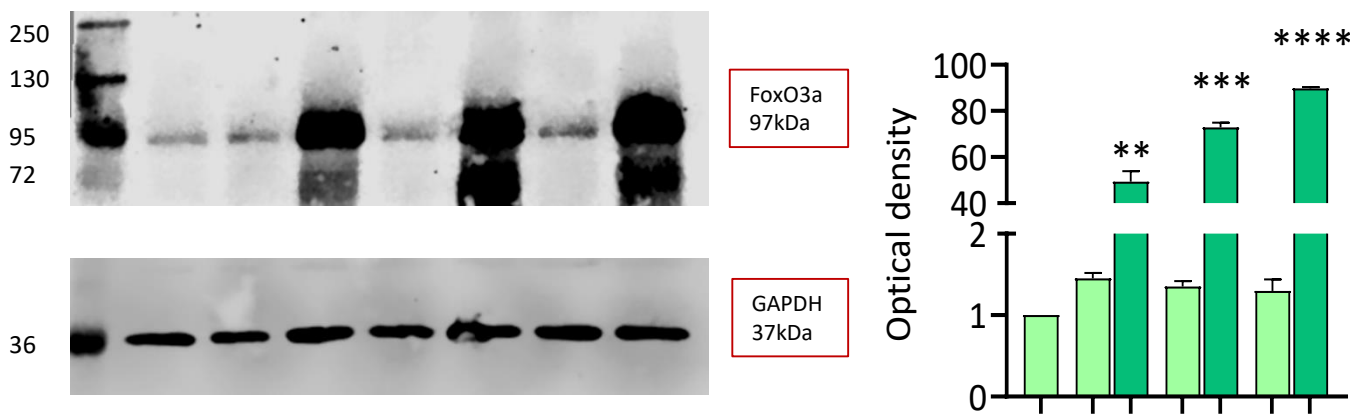

| Lane             | 1    | 2    | 3    | 4    | 5    | 6    | 7    |
|------------------|------|------|------|------|------|------|------|
| FoxO3a           | 1.1  | 1.1  | 74   | 1.2  | 82.2 | 1.8  | 100  |
| GAPDH            | 8.51 | 7.40 | 14.3 | 7    | 10.2 | 13.1 | 10.6 |
| Ratio            | 0.1  | 0.15 | 5.2  | 0.17 | 8.1  | 0.14 | 11.5 |
| Normalized ratio | 1    | 1.5  | 52   | 1.7  | 81   | 1.4  | 94   |

Appendix B (a)

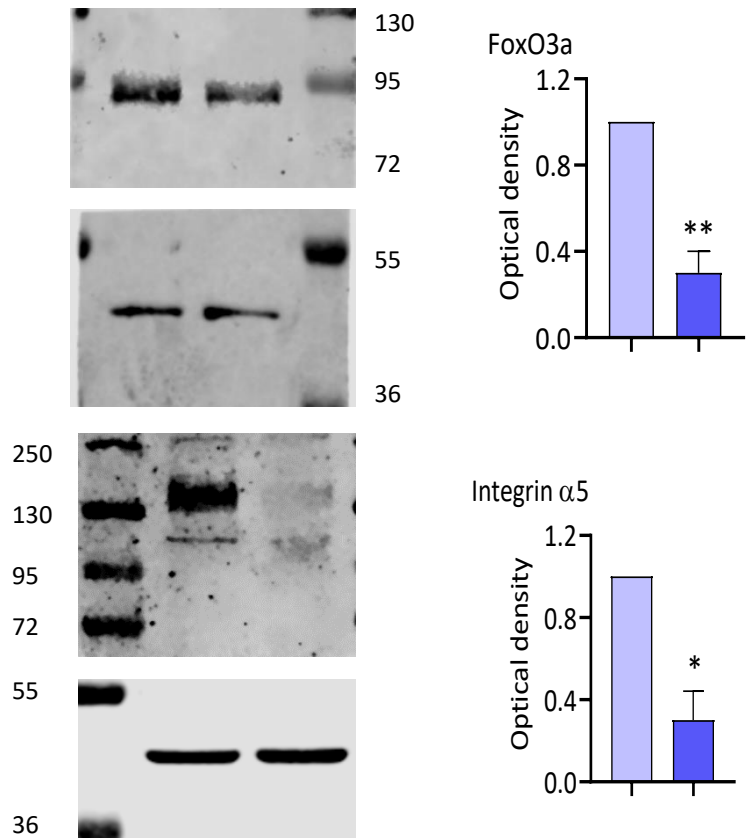

| Lane             | 1    | 2    |
|------------------|------|------|
| FoxO3a           | 6    | 3    |
| Actin            | 9.2  | 9.2  |
| Ratio            | 0.65 | 0.4  |
| Normalized ratio | 1    | 0.46 |

| Lane                | 1    | 2    |
|---------------------|------|------|
| Integrin $\alpha 5$ | 8.5  | 1.4  |
| Actin               | 49.9 | 53.7 |
| Ratio               | 0.2  | 0.03 |
| Normalized ratio    | 1    | 0.2  |

Appendix B (b)

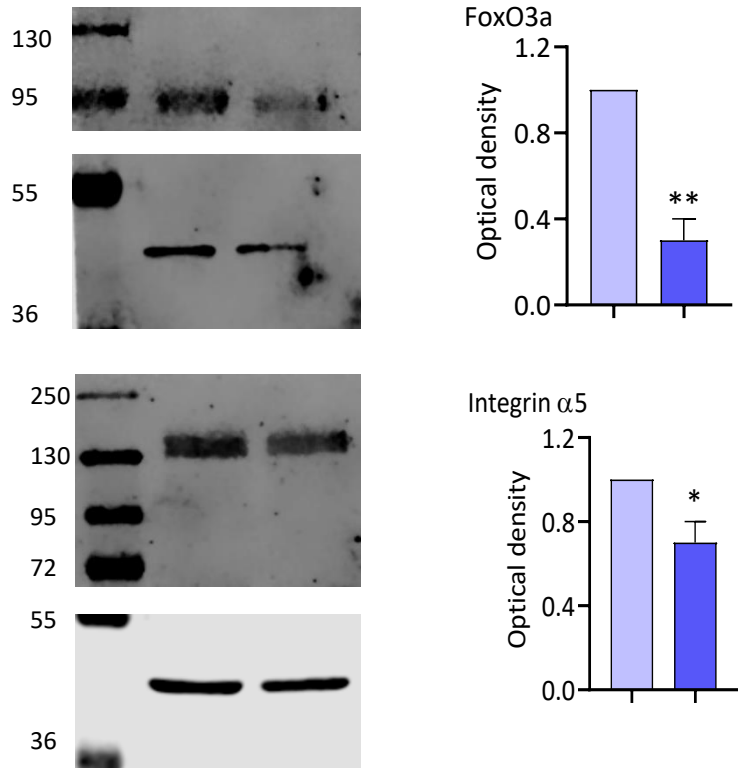

| Lane             | 1   | 2    |
|------------------|-----|------|
| FoxO3a           | 2.2 | 0.67 |
| Actin            | 1.7 | 1.3  |
| Ratio            | 1.3 | 0.5  |
| Normalized ratio | 1   | 0.38 |

| Lane                | 1    | 2    |
|---------------------|------|------|
| Integrin $\alpha 5$ | 4.8  | 3.9  |
| Actin               | 46.8 | 44.2 |
| Ratio               | 0.1  | 0.08 |
| Normalized ratio    | 1    | 0.8  |

Appendix B (c)

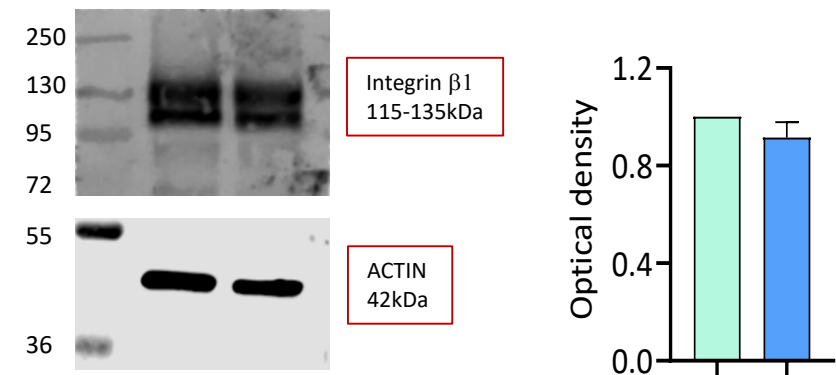

|                    |      |      |
|--------------------|------|------|
| Lane               | 1    | 2    |
| Integrin $\beta$ 1 | 25   | 18.5 |
| Actin              | 98.5 | 74.7 |
| Ratio              | 0.25 | 0.25 |
| Normalized ratio   | 1    | 1    |

Appendix B (e)

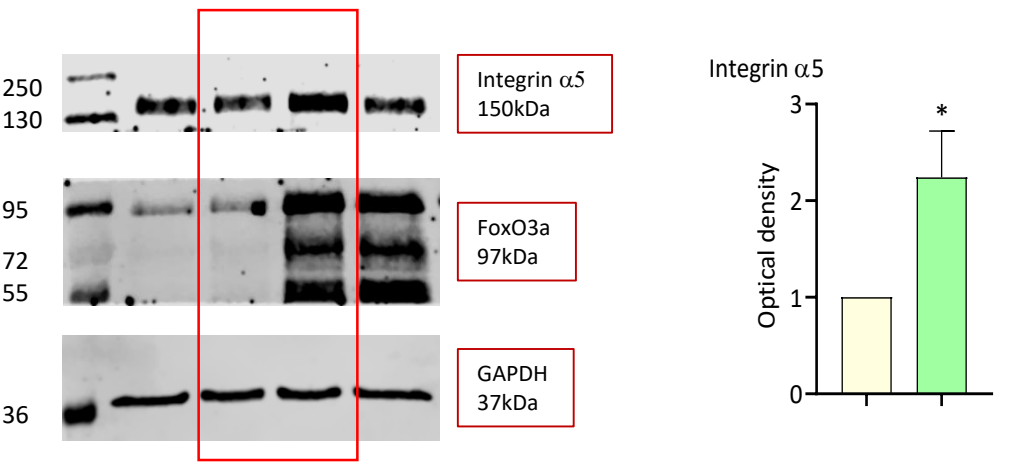

|                     |      |      |
|---------------------|------|------|
| Lane                | 1    | 2    |
| Integrin $\alpha$ 5 | 11.2 | 24.3 |
| GAPDH               | 11.3 | 12.2 |
| Ratio               | 1    | 2    |
| Normalized ratio    | 1    | 2    |

|                  |      |      |
|------------------|------|------|
| Lane             | 1    | 2    |
| FoxO3a           | 2.4  | 16   |
| GAPDH            | 11.3 | 12.2 |
| Ratio            | 0.2  | 1.3  |
| Normalized ratio | 1    | 6.5  |

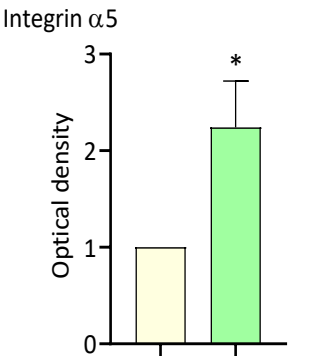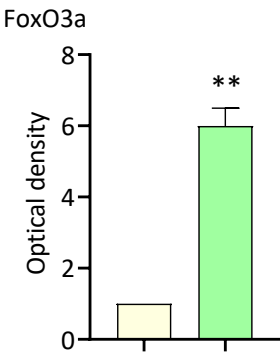

## Appendix B (f)

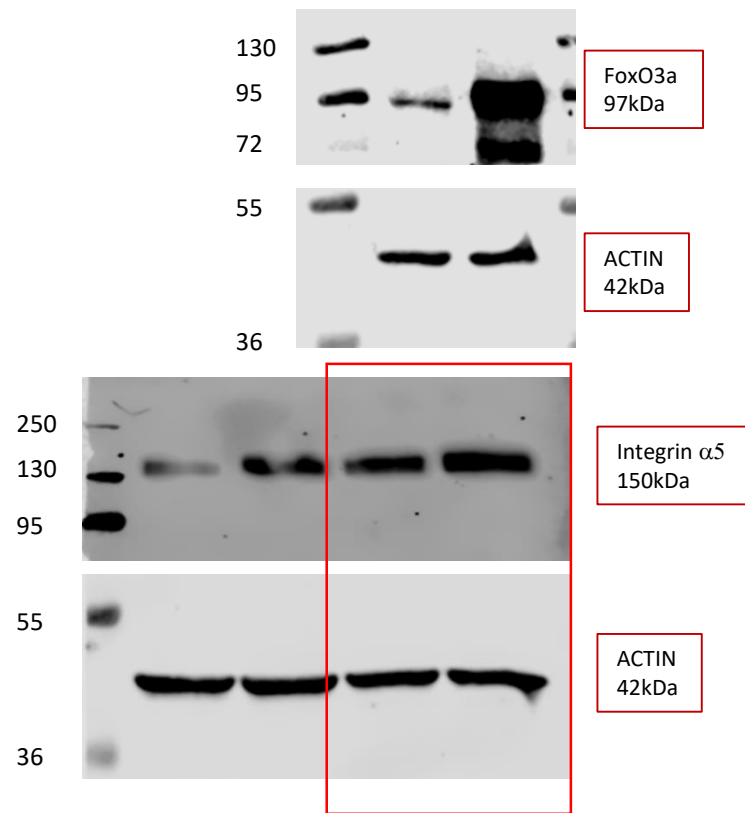

| Lane             | 1    | 2    |
|------------------|------|------|
| FoxO3a           | 4.8  | 183  |
| Actin            | 29.1 | 33.4 |
| Ratio            | 0.2  | 5.5  |
| Normalized ratio | 1    | 27.5 |

| Lane             | 1    | 2    |
|------------------|------|------|
| Integrin α5      | 1.2  | 2.3  |
| Actin            | 39.9 | 47   |
| Ratio            | 0.03 | 0.05 |
| Normalized ratio | 1    | 1.7  |

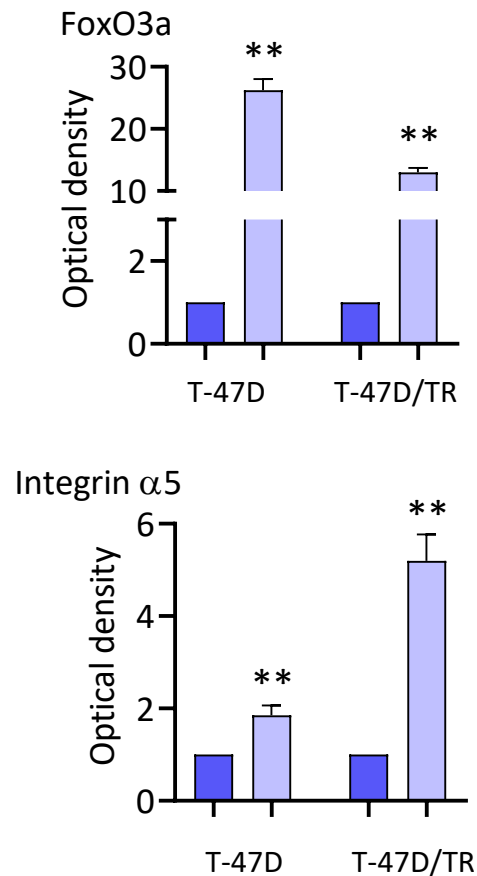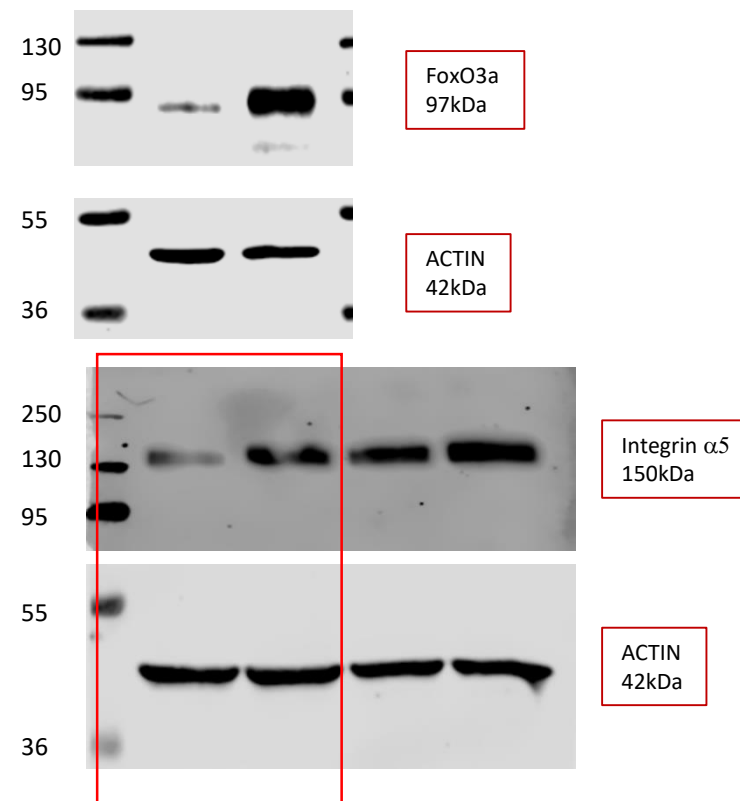

| Lane             | 1    | 2    |
|------------------|------|------|
| FoxO3a           | 1.3  | 9.9  |
| Actin            | 29.1 | 18.9 |
| Ratio            | 0.04 | 0.5  |
| Normalized ratio | 1    | 12.5 |

| Lane             | 1    | 2    |
|------------------|------|------|
| Integrin α5      | 2.8  | 11.7 |
| Actin            | 51.7 | 45.2 |
| Ratio            | 0.05 | 0.3  |
| Normalized ratio | 1    | 6    |

# Appendix B (g)

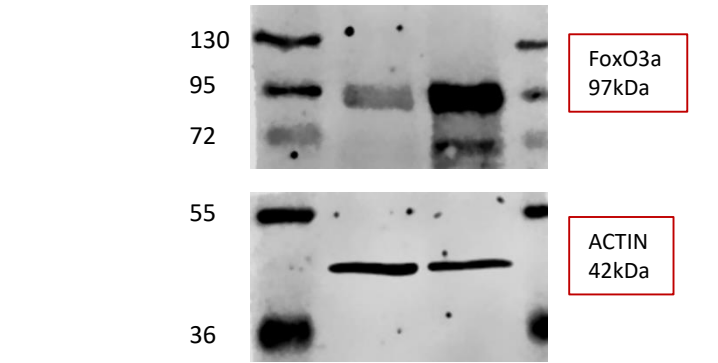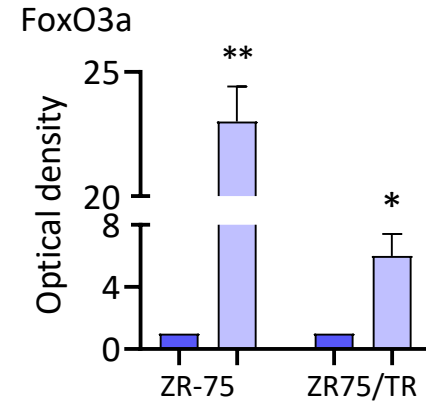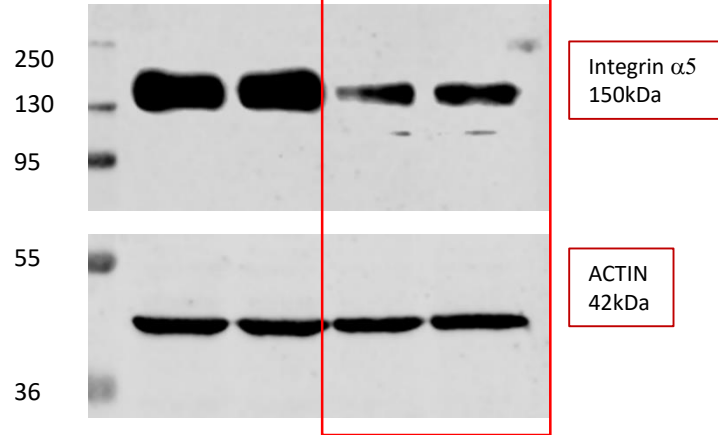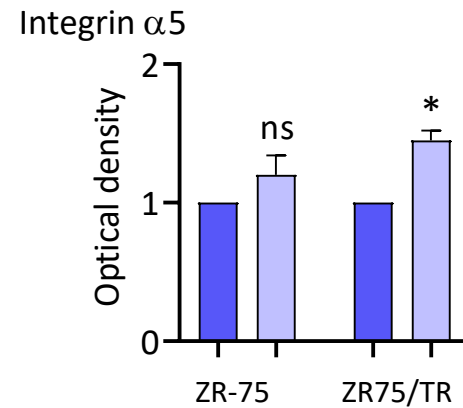

| Lane             | 1    | 2    |
|------------------|------|------|
| FoxO3a           | 4    | 50   |
| Actin            | 34.2 | 21.1 |
| Ratio            | 0.1  | 2.4  |
| Normalized ratio | 1    | 24   |

| Lane             | 1    | 2    |
|------------------|------|------|
| Integrin α5      | 2    | 2.8  |
| Actin            | 55.4 | 60.8 |
| Ratio            | 0.04 | 0.05 |
| Normalized ratio | 1    | 1.2  |

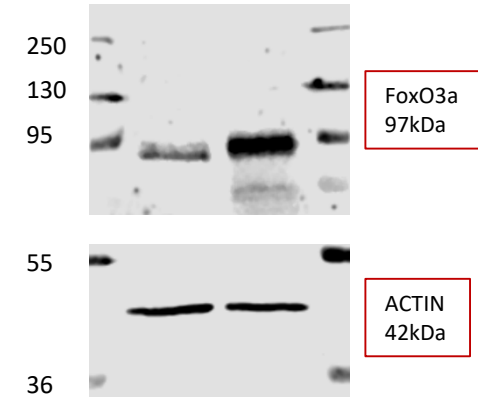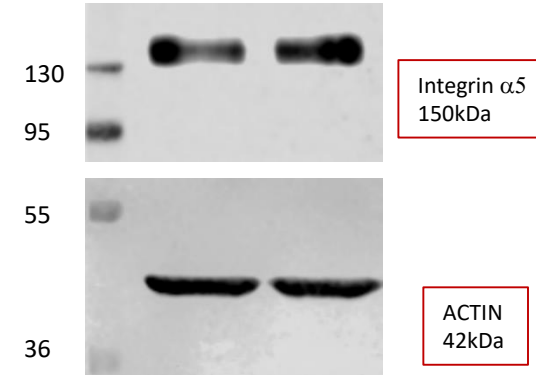

| Lane             | 1    | 2    |
|------------------|------|------|
| FoxO3a           | 5    | 21   |
| Actin            | 24.3 | 21.7 |
| Ratio            | 0.2  | 1    |
| Normalized ratio | 1    | 5    |

| Lane             | 1    | 2    |
|------------------|------|------|
| Integrin α5      | 1.7  | 2    |
| Actin            | 73.8 | 59.5 |
| Ratio            | 0.02 | 0.03 |
| Normalized ratio | 1    | 1.5  |

Appendix B (I)

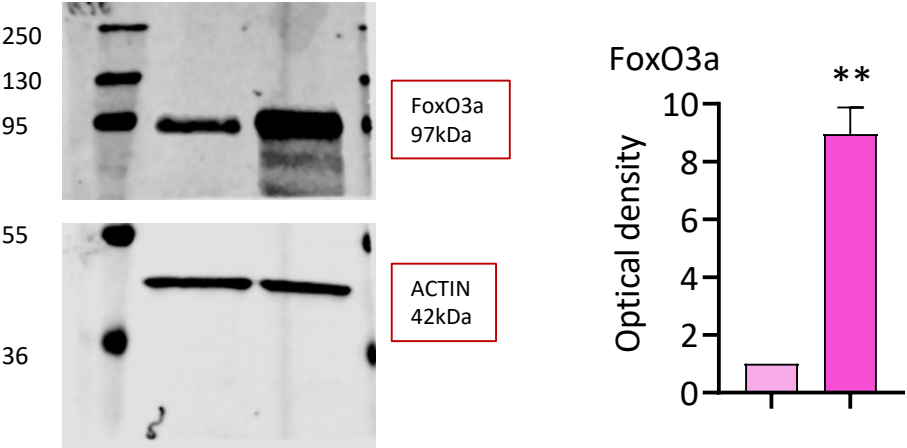

|                  |      |      |
|------------------|------|------|
| Lane             | 1    | 2    |
| FoxO3a           | 17.1 | 166  |
| Actin            | 25.1 | 25.4 |
| Ratio            | 0.7  | 6.5  |
| Normalized ratio | 1    | 9.3  |

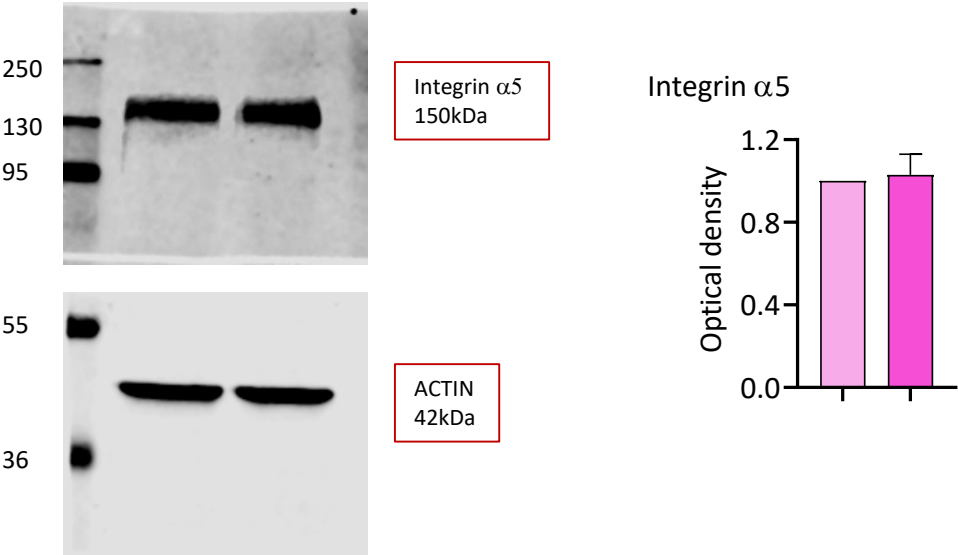

|                  |      |      |
|------------------|------|------|
| Lane             | 1    | 2    |
| Integrin α5      | 32.2 | 35.7 |
| Actin            | 49.8 | 49.2 |
| Ratio            | 0.65 | 0.72 |
| Normalized ratio | 1    | 1.1  |

Appendix C (a)

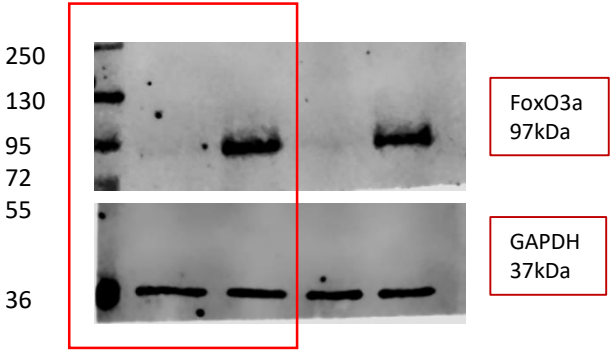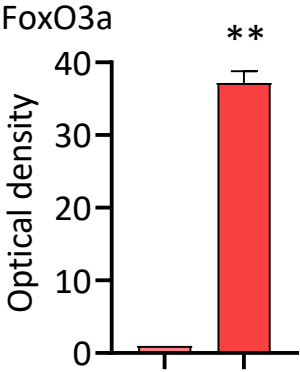

| Lane             | 1    | 2    |
|------------------|------|------|
| FoxO3a           | 0.2  | 7    |
| GAPDH            | 3.1  | 3.04 |
| Ratio            | 0.06 | 2.3  |
| Normalized ratio | 1    | 38.3 |

Appendix C (b)

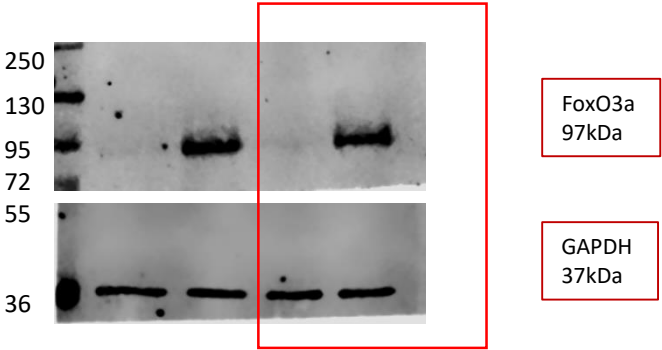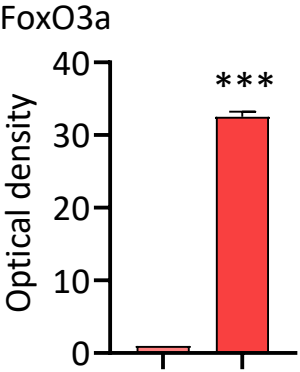

| Lane             | 1    | 2   |
|------------------|------|-----|
| FoxO3a           | 0.2  | 6.2 |
| GAPDH            | 3.8  | 3.8 |
| Ratio            | 0.05 | 1.6 |
| Normalized ratio | 1    | 32  |
